# Supplementary material
Source: PubMed Central journal article supplement (PMC3438968)

## SUPPLEMENTAL FIGURE LEGENDS:

**FIGURE S1. TGF- $\beta$ 1 induces EMT in lung cancer A549 cells.** *A-D*, A549 cells were grown in the absence (UT) or presence of TGF- $\beta$ 1 for the indicated times. Phase contrast images are shown. *E-P*, cells were fixed and stained with antibodies against pSmad3 (red) (*E-H*), E-cadherin (green) (*I-L*) and fibronectin (red) (*M-P*), followed by incubation with fluorescent dye-tagged secondary antibodies. DAPI was used to stain nuclei. *R*, untreated (UT) or TGF- $\beta$ 1-treated A549 cells were lysed and cleared cell lysates were subjected to SDS-PAGE and immunoblotted with anti-pSmad3, anti-Smad3, anti-fibronectin or anti-E-cadherin antibody. Equal protein loading was confirmed by reprobing blots with an anti- $\beta$ -actin antibody.

**FIGURE S2. Zyxin localizes at adherens junctions.** A549 cells grown in either serum free media or media supplemented with TGF- $\beta$ 1 for 24 h. Cells were fixed and immunostained with anti-zyxin (red) or anti-p120 (green) antibody. DAPI (blue) was used to stain nuclei. Scale bar: 20  $\mu$ m.

**FIGURE S3. TGF- $\beta$ 1-dependent zyxin expression in lung cancer cells.** NSCLC cells (A549, H2030, H441 and H1299) and SCLC cells (DMS273 and H82) were either untreated (UT) or treated with TGF- $\beta$ 1 for indicated times. Cells were lysed and Western blotting performed by using anti-pSmad3, anti-Smad3 or anti-zyxin antibodies. Anti- $\beta$ -actin was used as a loading control. Representative blots are shown.

**FIGURE S4. Zyxin mediates integrin  $\alpha$ 5 expression.** *A*, cells were transfected with either control (ctr) or one of two independent siRNAs directed against zyxin. Transfected cells were treated with TGF- $\beta$ 1 for 24 h and whole-cell lysates prepared. Equal amounts of protein were analyzed by Western blotting using anti-zyxin antibody and anti- $\beta$ -actin as a loading control. A549 cells were transfected with either control or zyxin specific siRNA. Control and zyxin-depleted A549 cells were grown in the absence or presence of TGF- $\beta$ 1 for 24 h. Cells were incubated with antibody against integrin  $\alpha$ 5 or immunoglobulin (IgG; gray) as isotype control and analysed by flow cytometry. Representative histograms are shown. *B*, A549 cells were transiently transfected with either control EGFP vector or zyxin-EGFP expression vector and then incubated in presence or absence of TGF- $\beta$ 1 for 24 h. The mRNA levels of both integrin  $\alpha$ 5 and integrin  $\beta$ 1 were quantified by qRT-PCR. Data are presented as the mean  $\pm$ SD of three independent experiments performed in duplicates.

Figure S1

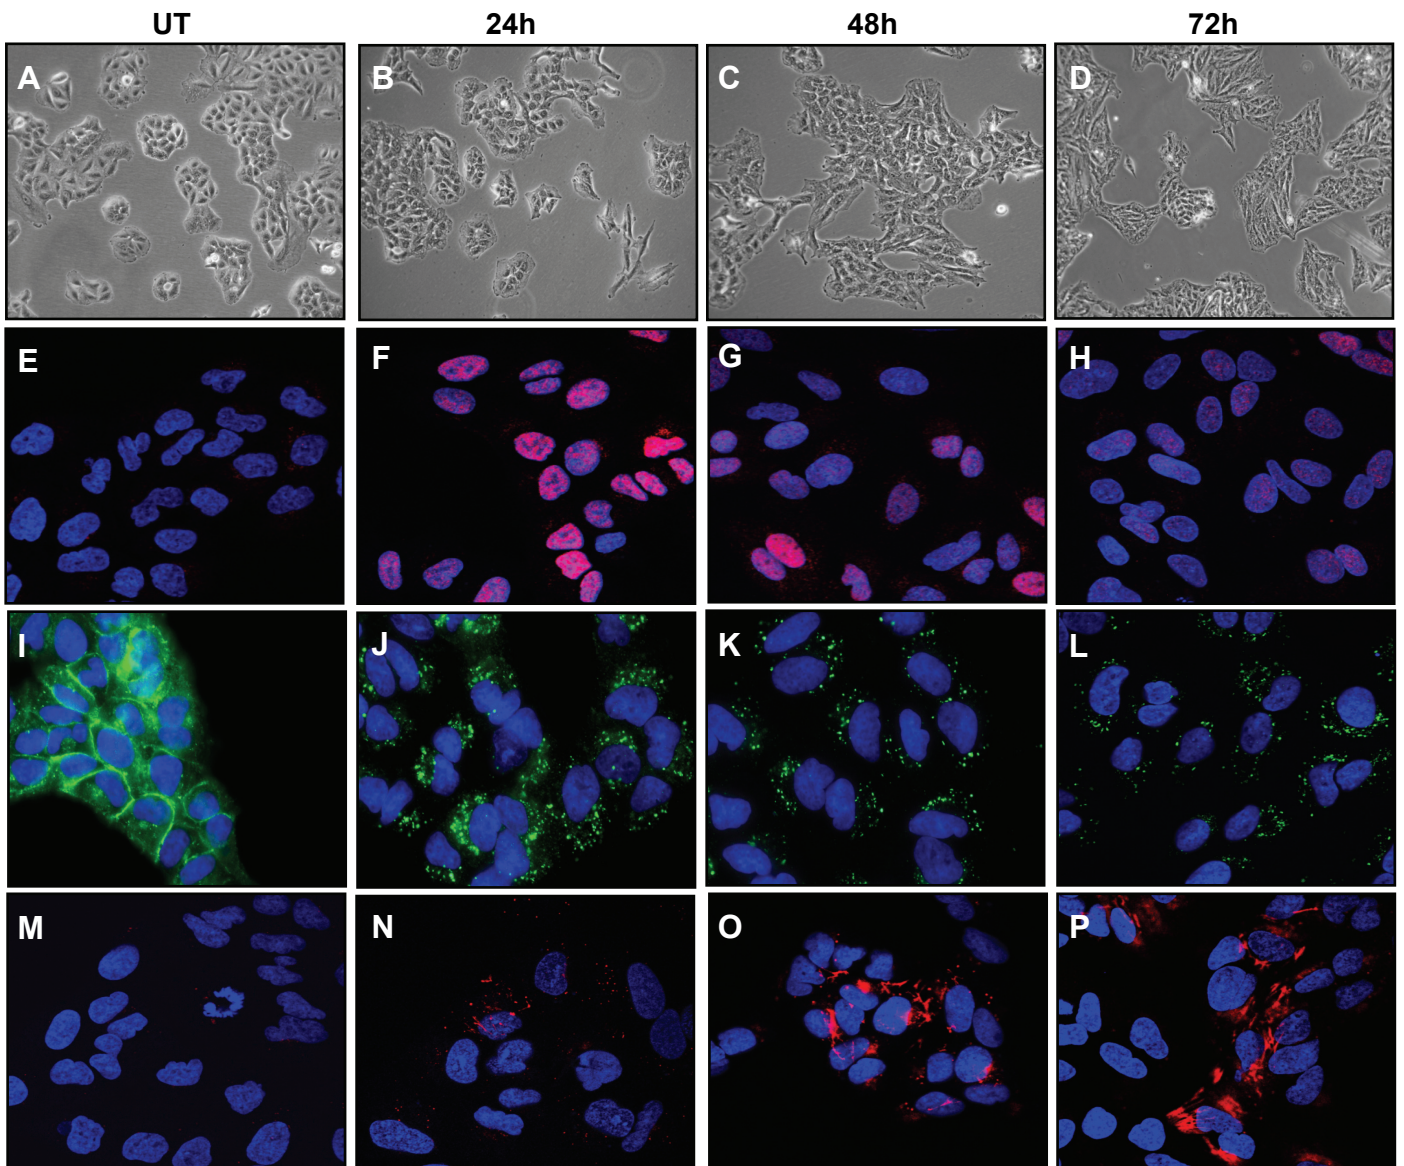

R

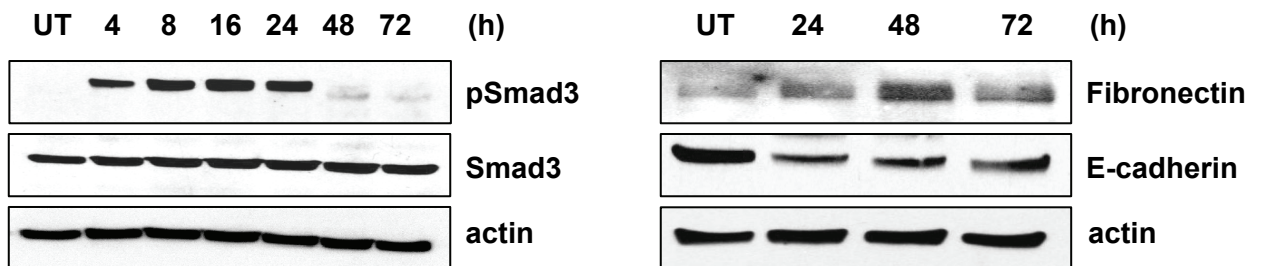

Figure S2

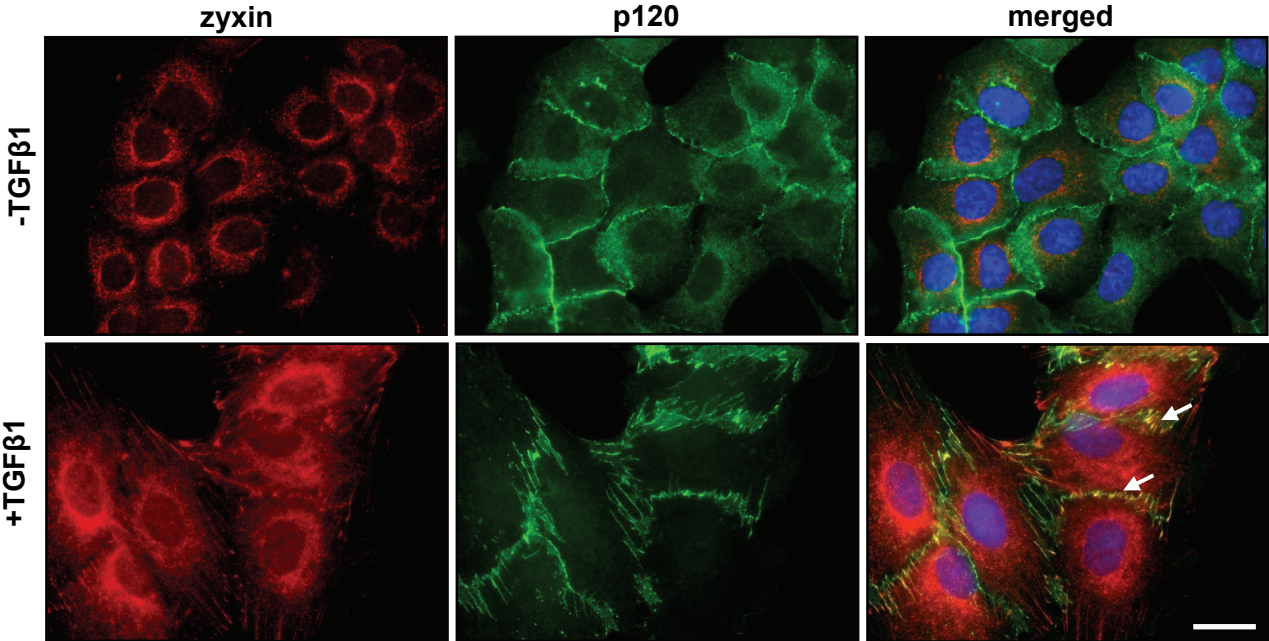

Figure S3

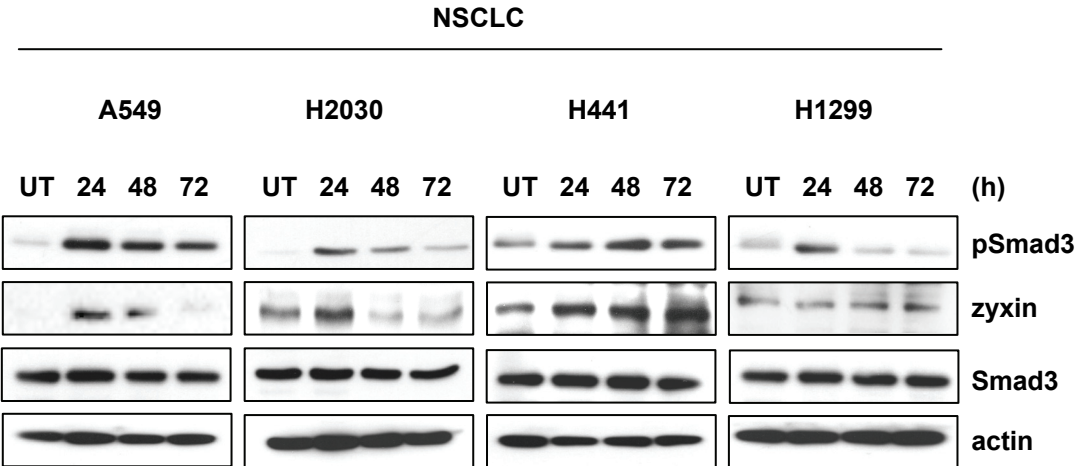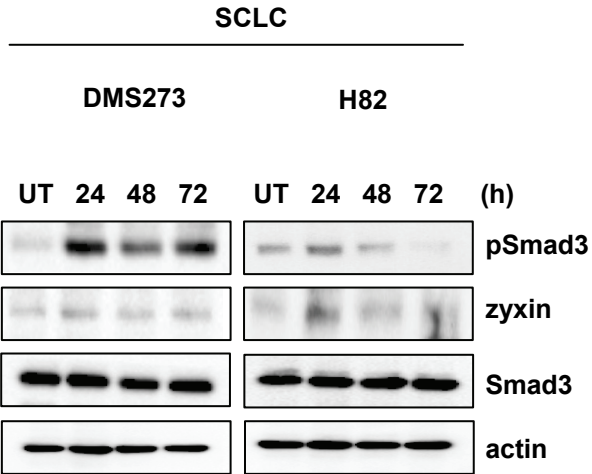

Figure S4

A

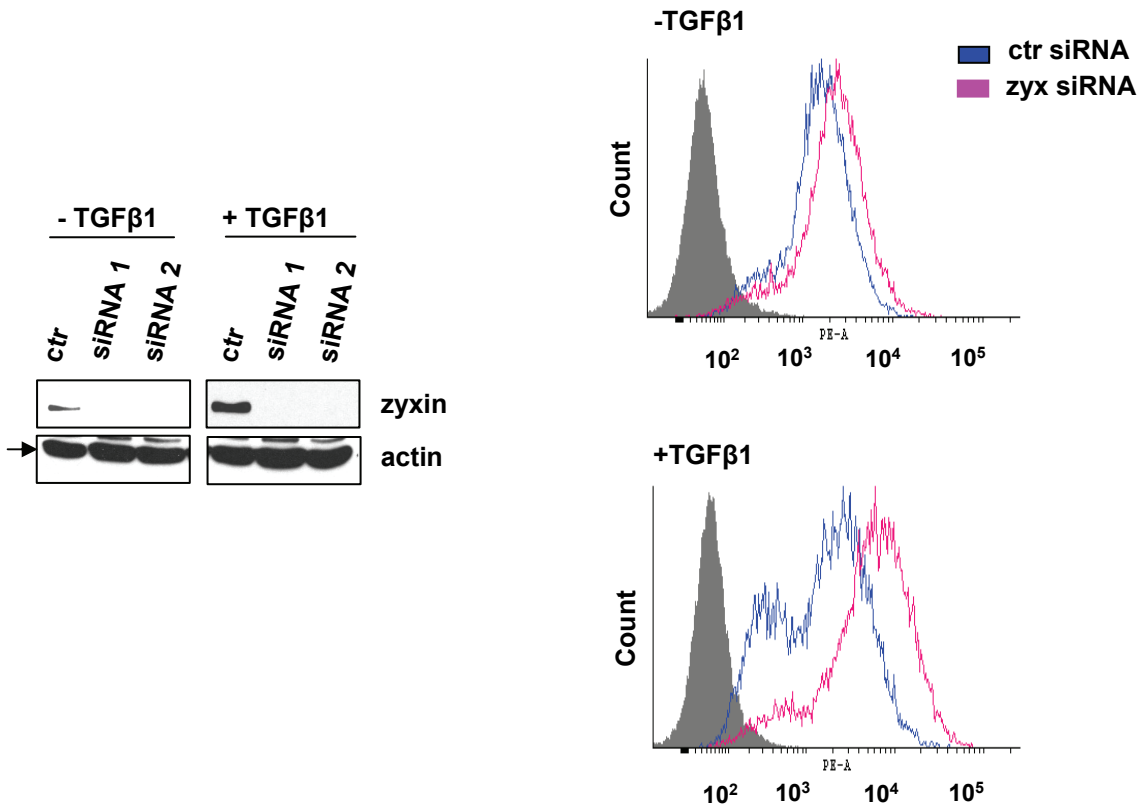

B

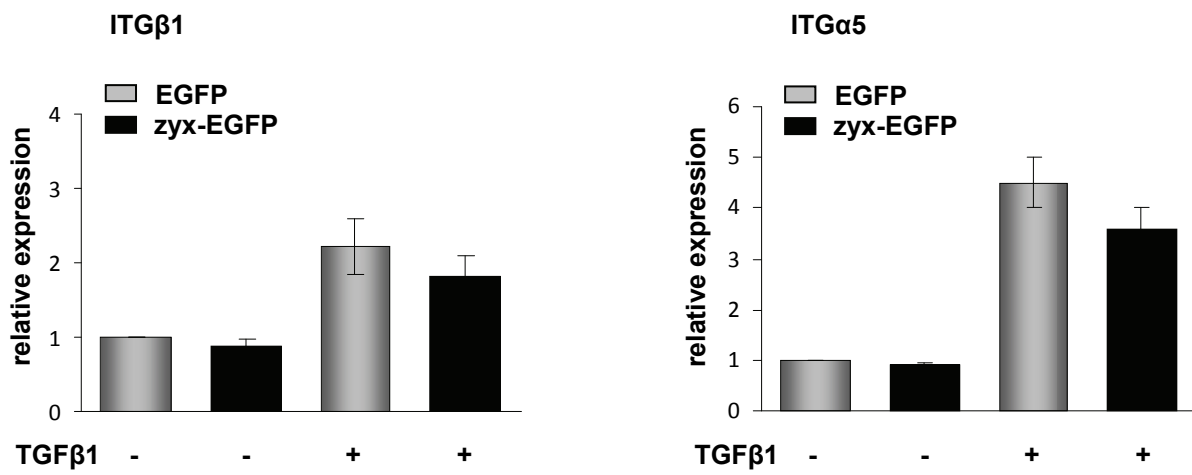

Supplement: supp_M112.357624_jbc.M112.357624-1.pdf [file supp_M112.357624_jbc.M112.357624-1.pdf]
